# Supplementary material
Source: Elsevier journal article supplement (https://www.sciencedirect.com/science/article/pii/S0033833821000849)
Supplement: mmc1 [file S0033833821000849:mmc1.pdf]

Todos los datos recogidos en este cuestionario serán registrados de forma anónima, siguiendo estrictamente las leyes y normas de protección de datos en vigor (Ley 41/2002 de 14 de noviembre; Ley 15/1999 de 15 de diciembre). Su consentimiento para la participación en el estudio se constatará con su cumplimentación.

## Apéndice: Cuestionario

### Parte 1: Información personal

- SEXO: [Hombre/Mujer](#)
- EDAD:
- CURSO MEDICINA: [1º/2º/3º/4º/5º/6º](#)
- FACULTAD: [UMA /Otros \(especificar si procede\)](#).
- Preferencias de especialidad: ([marcar UNA DE LAS 3](#))
  - La radiología está en mi top 3 a la hora de elegir especialidad
  - La radiología está por debajo de mi top 3
  - No tengo ningún interés en elegir radiología como especialidad

### Parte 2: Conocimiento previo del tema

- Muchas aplicaciones que usamos en el día a día ya utilizan la IA (reconocimiento de caras y de voz, algoritmos como el de Instagram o Youtube, filtros de spam...), ¿eras consciente de ello? [SI/NO/NSNC](#)
- ¿Conoces el debate actual acerca de la Inteligencia Artificial y sus potenciales aplicaciones en Radiología? [SI/NO/NSNC](#)
- Valora la siguiente frase: Entiendo bien lo que es la Inteligencia Artificial   
[Respuesta a la pregunta \(1: muy en desacuerdo, 2: algo en desacuerdo, 3: ni de acuerdo ni en desacuerdo, 4: algo de acuerdo, 5: muy de acuerdo\)](#)
- Test de conocimiento objetivo ([Verdadero o Falso](#)):
  - El Deep Learning es un conjunto de métodos de reconocimiento automático de patrones que ha sido aplicado con éxito en varios dominios del conocimiento, incluyendo el análisis de imágenes biomédicas [V](#)  [F](#)
  - La aplicación del Deep Learning en radiología requiere de grandes bases de datos de imágenes médicas etiquetadas [V](#)  [F](#)
  - Los sistemas de Deep Learning son bastante opacos: puede ser muy difícil definir el “proceso de pensamiento” subyacente [V](#)  [F](#)
  - La tecnología de Deep Learning existente puede conseguir un reconocimiento de patrones muy bueno, pero no puede hacer razonamientos deductivos. [V](#)  [F](#)

### Parte 3: Percepción sobre las posibles aplicaciones de la IA en radiología

#### ¿QUÉ APLICACIONES POTENCIALES PODRÍA TENER LA IA EN RADIOLOGIA?

[Respuesta a las preguntas \(1: muy en desacuerdo, 2: algo en desacuerdo, 3: ni de acuerdo ni en desacuerdo, 4: algo de acuerdo, 5: muy de acuerdo\)](#)

- La detección automatizada de patologías en imágenes radiológicas
- El diagnóstico automatizado a partir de imágenes radiológicas
- La indicación automatizada de las pruebas radiológicas correspondientes

Todos los datos recogidos en este cuestionario serán registrados de forma anónima, siguiendo estrictamente las leyes y normas de protección de datos en vigor (Ley 41/2002 de 14 de noviembre; Ley 15/1999 de 15 de diciembre). Su consentimiento para la participación en el estudio se constatará con su cumplimentación.

#### **Parte 4: Percepción del impacto de la IA en la especialidad de radiología**

Respuesta a las preguntas (1: muy en desacuerdo, 2: algo en desacuerdo, 3: ni de acuerdo ni en desacuerdo, 4: algo de acuerdo, 5: muy de acuerdo)

- La IA va a revolucionar el campo de la radiología.
- La IA va a revolucionar la medicina.
- En un futuro cercano la IA sustituirá completamente la figura del radiólogo
- En un futuro cercano la IA reducirá la demanda de radiólogos.
- En un futuro cercano la IA sustituirá completamente a la figura del médico.
- En un futuro cercano la IA reducirá la demanda de médicos.
- Los avances en IA mejorarán la capacidad de carga de trabajo y la eficiencia de los radiólogos, constituyendo un complemento bastante útil en su trabajo.
- Los radiólogos deberían aceptar estos cambios y trabajar con la industria informática para su aplicación.
- Se debería incluir una formación básica sobre IA en el currículo de medicina.

#### **Parte 5: Impacto del tema a nivel personal y en cuanto a la elección de especialidad**

Respuesta a las preguntas (1: muy en desacuerdo, 2: algo en desacuerdo, 3: ni de acuerdo ni en desacuerdo, 4: algo de acuerdo, 5: muy de acuerdo)

- Este tema me preocupa a la hora de elegir la radiología como potencial carrera profesional
- Estos avances hacen la medicina en general y la radiología en particular más atractivas o interesantes para mí
- Teniendo en cuenta el imprevisible impacto de la IA en la radiología, por favor VUELVE A REESPECIFICAR tus preferencias de especialidad ([marcar UNA DE LAS 3](#))
  - La radiología está en mi top 3 a la hora de elegir especialidad
  - La radiología está por debajo de mi top 3
  - No tengo ningún interés en elegir radiología como especialidad

#### **Parte 6: Comentario abierto**

Escribe aquí tu valoración sobre el cuestionario, dudas sobre el mismo o si recomendarías este cuestionario a tus compañeros o estarías dispuesto a pasárselo.
